# Supplementary material for: Characterization of Aerosol Pollution in Two Hungarian Cities in Winter 2009–2010
Source: MDPI journal article supplement (doi:10.3390/atmos13040554), 2022-03-30
Supplement: s1 [file s1]

## Supplementary Materials

**Table S1:** Minimum detection limits (MDL) and analytical uncertainties of the of the applied analytical methods.

|                            | MDL<br>(ng/m3) | Anal. uncertainty<br>(%) | Method           |
|----------------------------|----------------|--------------------------|------------------|
| <b>PM<sub>2.5</sub></b>    | 1000           | 5                        | gravimerty       |
| <b>PM<sub>coarse</sub></b> | 1000           | 5                        | gravimerty       |
| <b>BC</b>                  | 100            | 10                       | light reflection |
| <b>Al</b>                  | 5.04           | 10                       | PIXE             |
| <b>Si</b>                  | 2.48           | 5                        | PIXE             |
| <b>P</b>                   | 0.94           | 10                       | PIXE             |
| <b>S</b>                   | 1.32           | 3                        | PIXE             |
| <b>Cl</b>                  | 0.77           | 3                        | PIXE             |
| <b>K</b>                   | 0.58           | 3                        | PIXE             |
| <b>Ca</b>                  | 0.89           | 3                        | PIXE             |
| <b>Ti</b>                  | 0.32           | 5                        | PIXE             |
| <b>V</b>                   | 0.35           | 8                        | PIXE             |
| <b>Cr</b>                  | 0.27           | 8                        | PIXE             |
| <b>Mn</b>                  | 0.34           | 5                        | PIXE             |
| <b>Fe</b>                  | 0.96           | 3                        | PIXE             |
| <b>Co</b>                  | 0.42           | 10                       | PIXE             |
| <b>Ni</b>                  | 0.18           | 10                       | PIXE             |
| <b>Cu</b>                  | 0.21           | 3                        | PIXE             |
| <b>Zn</b>                  | 0.25           | 3                        | PIXE             |
| <b>As</b>                  | 0.71           | 8                        | PIXE             |
| <b>Br</b>                  | 0.61           | 8                        | PIXE             |
| <b>Sr</b>                  | 1.16           | 10                       | PIXE             |
| <b>Ba</b>                  | 1.65           | 10                       | PIXE             |
| <b>Pb</b>                  | 0.92           | 8                        | PIXE             |

**Table S2:** Absolute (in  $\mu\text{g}/\text{m}^3$ ) and relative (in%) source contributions.

| Debrecen PM <sub>2.5</sub>    |                    |         |                 |     |      |           |
|-------------------------------|--------------------|---------|-----------------|-----|------|-----------|
|                               | secondary sulphate | traffic | biomass burning | Cl  | soil | road dust |
| <b>whole period</b>           | 7.5                | 1.5     | 3.7             | 1.6 | 1.2  | 1.1       |
| (rel. contribution)           | 45%                | 9%      | 22%             | 9%  | 7%   | 7%        |
| <b>working days</b>           | 7.3                | 1.5     | 3.9             | 1.7 | 1.3  | 1.2       |
| (rel. contribution)           | 43%                | 9%      | 23%             | 10% | 8%   | 7%        |
| <b>weekends</b>               | 8.3                | 1.6     | 3               | 1.2 | 0.8  | 0.8       |
| (rel. contribution)           | 54%                | 10%     | 19%             | 8%  | 5%   | 5%        |
| <b>AQ limit exceedances</b>   | 14.4               | 3       | 6.1             | 3.6 | 0.9  | 1.4       |
| (rel. contribution)           | 49%                | 10%     | 21%             | 12% | 3%   | 5%        |
| Budapest PM <sub>2.5</sub>    |                    |         |                 |     |      |           |
|                               | secondary sulphate | traffic | biomass burning | Cl  | soil | asphalt   |
| <b>whole period</b>           | 7.6                | 3.9     | 5.9             | 0.6 | 2.7  | 0.3       |
| (rel. contribution)           | 36%                | 19%     | 28%             | 3%  | 13%  | 1.2%      |
| <b>working days</b>           | 7.5                | 4.3     | 6.1             | 0.7 | 2.8  | 0.3       |
| (rel. contribution)           | 34%                | 20%     | 28%             | 3%  | 13%  | 1.4%      |
| <b>weekends</b>               | 7.7                | 3       | 5.5             | 0.3 | 2.4  | 0.1       |
| (rel. contribution)           | 40%                | 16%     | 29%             | 2   | 13%  | 0.7%      |
| <b>AQ limit exceedances</b>   | 13.4               | 5.7     | 8.8             | 0.6 | 2.4  | 0.2       |
| (rel. contribution)           | 43%                | 18%     | 28%             | 2   | 8%   | 0.7%      |
| Debrecen PM <sub>coarse</sub> |                    |         |                 |     |      |           |
|                               | combustion         | traffic |                 | Cl  | soil |           |
| <b>whole period</b>           | 1.5                | 1       |                 | 0.4 | 2.3  |           |
| (rel. contribution)           | 29%                | 19%     |                 | 8%  | 44%  |           |
| <b>working days</b>           | 1.5                | 1       |                 | 0.5 | 2.5  |           |
| (rel. contribution)           | 27%                | 19%     |                 | 9%  | 46%  |           |
| <b>weekends</b>               | 1.4                | 0.7     |                 | 0.3 | 1.4  |           |
| (rel. contribution)           | 28%                | 20%     |                 | 7%  | 36%  |           |
| Budapest PM <sub>coarse</sub> |                    |         |                 |     |      |           |
|                               | combustion         | traffic |                 | Cl  | soil | road dust |
| <b>whole period</b>           | 2.3                | 0.9     |                 | 0.4 | 1.7  | 3         |
| (rel. contribution)           | 28%                | 11%     |                 | 5%  | 21%  | 36%       |
| <b>working days</b>           | 2.6                | 1       |                 | 0.3 | 2.1  | 3.4       |
| (rel. contribution)           | 28%                | 11%     |                 | 4%  | 22%  | 36%       |
| <b>weekends</b>               | 1.5                | 0.5     |                 | 0.5 | 0.9  | 2         |
| (rel. contribution)           | 28%                | 9%      |                 | 9%  | 18%  | 37%       |
